Anesthesiology  
83:120-126, 1995  
© 1995 American Society of Anesthesiologists, Inc.  
Lippincott-Raven Publishers

## Halothane and Isoflurane Alter the $\text{Ca}^{2+}$ Binding Properties of Calmodulin

Aaron Levin, M.D.,\* Thomas J. J. Blanck, M.D., Ph.D.†

**Background:**  $\text{Ca}^{2+}$  plays an important role in signal transduction and anesthetic mechanisms. To date, no one has observed a direct effect of volatile anesthetics on a  $\text{Ca}^{2+}$ -binding protein. We therefore examined the effects of halothane and isoflurane on the  $\text{Ca}^{2+}$ -binding properties of bovine brain calmodulin.

**Methods:** The fluorescence emission of calmodulin was obtained over a range of  $\text{Ca}^{2+}$  concentrations ( $10^{-7}$ – $10^{-4}$  M) in the presence and absence of halothane and isoflurane. The intrinsic tyrosine fluorescence of calmodulin was measured at an excitation wavelength of 280 nm and an emission wavelength of 320 nm. Fluorescence measurements were carried out in 50 mM hydroxyethylpiperazineethane sulfonic acid, 100 mM KCl, and 2 mM ethyleneglycol-bis-( $\beta$ -aminoethyl ether) tetraacetic acid at pH 7.0 and 37°C. Experiments were performed in polytetrafluorethylene-sealed cuvettes so that the volatile anesthetic concentrations remained constant. The titration data were analyzed in two ways. The data were fit to the Hill equation by using nonlinear regression analysis to derive the Hill coefficient and the dissociation constant. The data were also analyzed by two-way analysis of variance with multiple comparisons to determine statistically significant effects. Volatile anesthetic concentrations were measured by gas chromatography.

**Results:** The presence of volatile anesthetics altered the  $\text{Ca}^{2+}$ -binding affinity of calmodulin in a dose-dependent fashion. At 0.57% (0.25 mm) halothane and 1.7% (0.66 mm) isoflurane, the affinity of calmodulin for  $\text{Ca}^{2+}$  relative to control was decreased. However, at higher concentrations of both anesthetics, the affinity for  $\text{Ca}^{2+}$  was increased. When the volatile anesthetics were allowed to evaporate from the experimental solutions, the observed rightward shift of the calmodulin- $\text{Ca}^{2+}$  binding curve for  $\text{Ca}^{2+}$  at low concentrations of the anesthetics returned to the control position. The leftward shift seen at high concentrations of the anesthetics was irreversible

after evaporation of 8.7% (3.3 mm) isoflurane and 5.7% (2.5 mm) halothane.

**Conclusions:** These data demonstrate a complex interaction of two hydrophobic volatile anesthetics with calmodulin. A biphasic effect was observed both for halothane and for isoflurane. Calmodulin, an EF-hand  $\text{Ca}^{2+}$ -binding protein, undergoes a conformational shift when binding  $\text{Ca}^{2+}$ , exposing several hydrophobic residues. These residues may be sites at which the anesthetics act. (Key words: Anesthetics, volatile; halothane; isoflurane. Calcium-binding proteins: calmodulin. Ions: calcium. Measurement techniques: fluorescence emission.)

THE mechanisms through which the volatile anesthetics alter perceptions of pain, levels of consciousness, myocardial contractility, vascular resistance, and alveolar ventilation remain unknown. Several clues, however, suggest that these anesthetics may accomplish their varied and complex tasks by affecting  $\text{Ca}^{2+}$  homeostasis.<sup>1</sup>

Evidence indicates that halothane depresses myocardial contractility by altering voltage-dependent  $\text{Ca}^{2+}$  channels and by changing  $\text{Ca}^{2+}$  release from the sarcoplasmic reticulum.<sup>2-5</sup> Further studies suggest that volatile anesthetics may affect signal transduction as well, by interfering with the  $\text{Ca}^{2+}$ -binding protein calmodulin.<sup>6,7</sup> Stepwise and sequential binding of  $\text{Ca}^{2+}$  to calmodulin selectively activates a host of enzymes, including phosphodiesterase, myosin light-chain kinase, calmodulin-dependent kinase, calcineurin, erythrocyte  $\text{Ca}^{2+}$ -adenosine triphosphatase, brain adenyl cyclase, phosphorylase kinase, and nitric oxide synthase.<sup>10</sup>

Halothane may inhibit some of these enzymes by specific interactions with calmodulin. Nosaka and Wong found that in the presence of calmodulin, volatile anesthetics weakly reduced the activity of myosin light-chain kinase.<sup>6</sup> Moreover, Rudnick *et al.* suggested that halothane may potentiate antitumor activity of  $\gamma$  interferon by binding to calmodulin and altering its interaction with  $\text{Ca}^{2+}$ -dependent kinases.<sup>7</sup>

Although the volatile anesthetics have been implicated in derangements of calmodulin- $\text{Ca}^{2+}$  signaling

\* Intern.

† Vice-Chair of Research; Professor of Anesthesiology; Professor of Pharmacology; and Professor of Physiology and Biophysics.

Received from the Department of Anesthesiology, Cornell University Medical College, New York, New York. Submitted for publication July 15, 1994. Accepted for publication March 13, 1995. Presented in part at the meeting of the Biophysical Society, New Orleans, Louisiana, March 7, 1994.

Address reprint requests to Dr. Blanck: Department of Anesthesiology, The Hospital for Special Surgery, 535 East 70th Street, New York, New York 10021.

pathways, there are no data that these anesthetics on the  $\text{Ca}^{2+}$ -binding protein calmodulin. In this study we monitored the fluorescence of calmodulin in the presence of halothane and isoflurane. Calmodulin, a 16,700-Da molecular weight member of the EF-hand family of proteins.<sup>8</sup> It contains two tyrosine residues within two of the four  $\text{Ca}^{2+}$ -binding sites.<sup>8</sup> When calmodulin binds  $\text{Ca}^{2+}$ , a conformational change occurs and enhances its fluorescence results.<sup>11-13</sup> Analysis of fluorescence emission spectra at various concentrations allowed us to determine the dissociation constants ( $K_d$ ) and Hill coefficients for  $\text{Ca}^{2+}$ -binding sites in the presence of volatile anesthetics and to compare these binding data. We took advantage of these anesthetics to determine whether calmodulin were reversible or irreversible.

### Materials and Methods

Bovine brain calmodulin was purchased from Chemical (St. Louis, MO) and was of 95% purity and was confirmed by mass spectrometry. The fluorescence emission of calmodulin was measured over a range of  $\text{Ca}^{2+}$  concentrations ( $10^{-7}$ – $10^{-4}$  M) in the presence of halothane and isoflurane. Solutions were formulated according to the program of Fabiato and Fabiato, as modified by Berman.<sup>14</sup> Halothane and isoflurane were added to the solutions from 0.5–8.7% (0.25–5 mm) by adding aliquots of anesthetic-saturated solutions to the experimental solutions. Anesthetics were verified by gas chromatography. The intrinsic tyrosine fluorescence of calmodulin was measured in a spectrofluorometer (RF-1020, Shimadzu, Rochester, NY) at an excitation wavelength of 280 nm and an emission wavelength of 320 nm. The fluorescence of calmodulin is known to be enhanced by  $\text{Ca}^{2+}$ . In control titration experiments, aliquots of  $\text{CaCl}_2$  were added to a solution containing 1  $\mu\text{M}$  calmodulin, 50 mM KCl, 100 mM hydroxyethylpiperazineethane sulfonic acid, 1 mM ethyleneglycol-bis-( $\beta$ -aminoethyl ether) tetraacetic acid, and 50 mM NaOH.

# Personal communication.

ANESTHETICS ALTER  $\text{Ca}^{2+}$  BINDING OF CALMODULIN

pathways, there are no data that show direct effects of these anesthetics on the  $\text{Ca}^{2+}$ -binding properties of calmodulin. In this study we monitored the intrinsic tyrosine fluorescence of calmodulin to measure the effects of halothane and isoflurane on  $\text{Ca}^{2+}$  binding.

Calmodulin, a 16,700-Da monomer, is a well-characterized member of the EF-hand family of  $\text{Ca}^{2+}$ -binding proteins.<sup>8</sup> It contains two tyrosine molecules, located within two of the four  $\text{Ca}^{2+}$ -binding loops in the protein.<sup>8</sup> When calmodulin binds  $\text{Ca}^{2+}$ , a conformational change occurs and enhancement of tyrosine fluorescence results.<sup>11-13</sup>

Analysis of fluorescence emission over a range of  $\text{Ca}^{2+}$  concentrations allowed us to estimate dissociation constants ( $K_d$ ) and Hill coefficients ( $n$ ) for calmodulin's  $\text{Ca}^{2+}$ -binding sites in the presence and absence of volatile anesthetics and to compare them with known  $\text{Ca}^{2+}$ -binding data. We took advantage of the volatility of these anesthetics to determine whether their effects on calmodulin were reversible or irreversible.

## Materials and Methods

Bovine brain calmodulin was obtained from Sigma Chemical (St. Louis, MO) and Calbiochem (La Jolla, CA) and purity was confirmed by gel electrophoresis. The fluorescence emission of calmodulin at 320 nm was measured over a range of  $\text{Ca}^{2+}$  concentrations ( $10^{-7}$ – $10^{-4}$  M) in the presence and absence of halothane and isoflurane. Solutions of fixed  $\text{Ca}^{2+}$  concentrations were formulated according to calculations based on the program of Fabiato and Fabiato<sup>14</sup> as modified by Berman.<sup>‡</sup> Halothane and isoflurane concentrations from 0.5–8.7% (0.25–5 mM) were generated by adding aliquots of anesthetic-saturated buffer to the experimental solutions. Anesthetic concentrations were verified by gas chromatography.

The intrinsic tyrosine fluorescence of calmodulin was measured in a spectrofluorometer (SLM-Aminco 8000, Rochester, NY) at an excitation wavelength of 280 nm and an emission wavelength of 320 nm. The fluorescence of calmodulin is known to increase on incubation with  $\text{Ca}^{2+}$ . In control titration experiments, small aliquots of  $\text{CaCl}_2$  were added to a fluorescence cuvette containing 1  $\mu\text{M}$  calmodulin, 50 mM hydroxyethylpiperazineethane sulfonic acid, 100 mM KCl, and 2 mM ethyleneglycol-bis-( $\beta$ -aminoethyl ether) tetraacetic

acid, at 37°C and pH 7.0. Over the range of the titration, pH varied less than 0.25 units. This variation has been shown not to significantly alter the affinity of calmodulin for  $\text{Ca}^{2+}$ .<sup>8</sup> Titrations in the presence of anesthetic were carried out with known concentrations of halothane or isoflurane added from saturated solutions to cuvettes containing 2 ml buffer; the cuvettes were sealed with polytetrafluorethylene to maintain constant volatile anesthetic concentrations. Aliquots of  $\text{CaCl}_2$  were added with a Hamilton syringe through the seal. In the reversibility experiments, the control and anesthetic additions were performed as described above, except that samples were kept in the dark after 15 min of exposure, and the cuvettes were unsealed and stirred for 1 h in a  $\text{N}_2$  atmosphere before  $\text{CaCl}_2$  aliquots were added. This procedure allowed time for the anesthetics to evaporate from the calmodulin-containing solutions. The absence of anesthetic was verified by gas chromatography. The cuvettes were then resealed, and  $\text{Ca}^{2+}$  titrations were carried out. Final concentrations of anesthetic were confirmed by gas chromatography.

The fluorescence data were normalized as follows. The fluorescence of calmodulin before  $\text{CaCl}_2$  additions ( $F_0$ ) was subtracted from intrinsic tyrosine fluorescence of calmodulin ( $F$ ), and the difference  $F - F_0$  was divided by the maximum fluorescence ( $F_{\text{max}}$ ) achieved after saturation with  $\text{Ca}^{2+}$ . The result,  $F_n$ , equal to  $(F - F_0)/F_{\text{max}}$ , was plotted *versus*  $\text{Ca}^{2+}$  concentration. All titration data were fit by nonlinear regression to the Hill equation,  $F_n = [\text{Ca}^{2+}]^n / ([\text{Ca}^{2+}]^n + K_d^n)$ . Parameters derived from nonlinear regression analyses were used with the Enzfitter program (R. J. Leatherbarrow, Elsevier Biosoft, Cambridge, UK) to generate the curves shown in figures 1–4. The statistical significance for the differences between anesthetic treatment and control were determined by two-way analysis of variance with multiple comparisons by using the Student-Neuman-Keuls method.<sup>15</sup>  $P$  values less than 0.05 were considered statistically significant.

## Results

$\text{Ca}^{2+}$  binding was measured by the change in intrinsic tyrosine fluorescence of calmodulin. The change in fluorescence was plotted as a function of  $\text{Ca}^{2+}$  and fit by nonlinear regression analysis to the Hill equation to yield a value for  $K_d$  and a value for  $n$ . Calmodulin from two sources was used in the experiments: calmodulin purchased from Sigma Chemical ( $\text{CaM}_s$ ) and calmodulin purchased from Calbiochem ( $\text{CaM}_c$ ). These two

‡ Personal communication.



preparations were characterized by different  $K_d$  and  $n$  values (table 1), a difference that we attribute to greater  $\text{Ca}^{2+}$  binding to  $\text{CaM}_s$  than to  $\text{CaM}_c$  before the  $\text{Ca}^{2+}$  titration and fluorescence measurement. Despite this quantitative difference, the qualitative changes in  $\text{Ca}^{2+}$  binding observed on exposure to halothane and isoflurane were essentially identical. The fluorescence spectra of  $\text{Ca}^{2+}$ -bound calmodulin at low and high anesthetic concentrations were identical to the spectra of control samples.

Volatile anesthetics altered the  $\text{Ca}^{2+}$ -binding affinity of  $\text{CaM}_s$  in a dose-dependent, biphasic fashion. Titrations were carried out at halothane concentrations of 0.57% (0.25 mM), 1.14% (0.5 mM), 2.27% (1.0 mM), and 5.68% (2.5 mM) and at isoflurane concentrations of 1.74% (0.66 mM) and 8.68% (3.3 mM). At low concentrations of halothane and isoflurane, the affinity of calmodulin for  $\text{Ca}^{2+}$  was decreased. At 1.74% isoflurane, for example,  $K_d$  was increased to  $6.99 \times 10^{-7}$  M from  $5.89 \times 10^{-7}$  M, indicating lower affinity. However, at higher concentrations of both anesthetics, the affinity for  $\text{Ca}^{2+}$  was increased. In the presence of 8.68% isoflurane, the  $K_d$  for  $\text{Ca}^{2+}$  decreased from  $5.89 \times 10^{-7}$  to  $5.09 \times 10^{-7}$  M (figs. 1 and 2 and table 1).

When  $\text{Ca}^{2+}$  titrations of  $\text{CaM}_s$  were carried out in the presence of 0.57% halothane and 1.74% isoflurane, the  $\text{Ca}^{2+}$ -calmodulin binding curve shifted to the right. These changes were statistically significantly different from control at the  $P < 0.05$  level, as determined by two-way analysis of variance. After exposure of calmodulin to anesthetic for 15 min followed by evaporation for 1 h to remove the anesthetic, the rightward shift was completely reversed, and  $\text{Ca}^{2+}$  binding re-

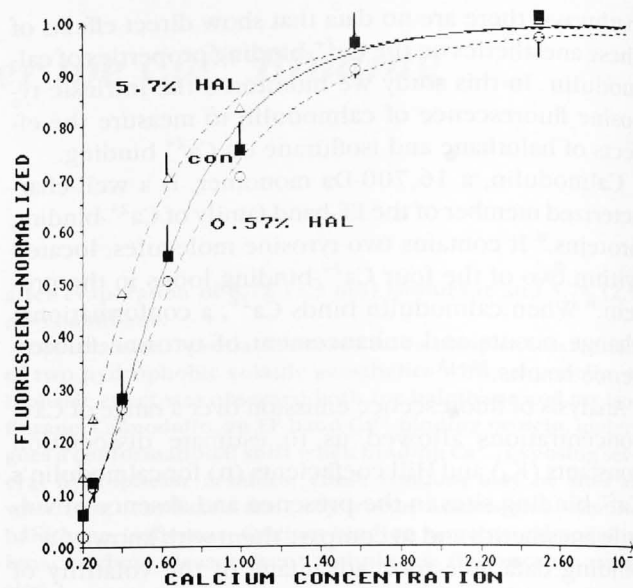

Fig. 1. The effect of halothane on the fluorescence response of calmodulin from Sigma Chemical ( $\text{CaM}_s$ ) to  $\text{Ca}^{2+}$ . The intrinsic tyrosine fluorescence of  $\text{CaM}_s$  was measured ( $\lambda_{\text{excitation}} = 280$  nm and  $\lambda_{\text{emission}} = 320$  nm) in the presence of 0 (squares), 0.57% (circles), and 5.7% (triangles) halothane. Normalized fluorescence is plotted as a function of free  $\text{Ca}^{2+}$  concentration (molarity). Each data point is the mean  $\pm$  SD of three independent determinations.

verted to control values. At higher concentrations of isoflurane (8.7%) and halothane (5.7%), the leftward shift of the  $\text{Ca}^{2+}$ -calmodulin binding curve induced by the anesthetics also was statistically significantly different from control. The leftward shift persisted even after the concentration of anesthetic in solution was

Table 1. The Effect of Halothane and Isoflurane on Calcium Binding to Calmodulin

| Halothane (%)  | 0                     | 0.57                  | 1.14                  | 2.27                  | 5.68                  |
|----------------|-----------------------|-----------------------|-----------------------|-----------------------|-----------------------|
| $\text{CaM}_s$ |                       |                       |                       |                       |                       |
| $K_d$ (M)      | $5.89 \times 10^{-7}$ | $6.84 \times 10^{-7}$ | $5.77 \times 10^{-7}$ | $5.08 \times 10^{-7}$ | $4.39 \times 10^{-7}$ |
| $n$            | 2.6                   | 2.5                   | 2.4                   | 2.2                   | 2.1                   |
| $\text{CaM}_c$ |                       |                       |                       |                       |                       |
| $K_d$ (M)      | $1.76 \times 10^{-6}$ | $3.1 \times 10^{-6}$  |                       |                       | $4.00 \times 10^{-7}$ |
| $n$            | 1.8                   | 1.3                   |                       |                       | 2.2                   |
| Isoflurane (%) | 0                     | 1.74                  | 8.68                  |                       |                       |
| $\text{CaM}_s$ |                       |                       |                       |                       |                       |
| $K_d$ (M)      | $5.89 \times 10^{-7}$ | $6.99 \times 10^{-7}$ | $5.09 \times 10^{-7}$ |                       |                       |
| $n$            | 2.6                   | 2.6                   | 2.7                   |                       |                       |

Data show the effect of halothane and isoflurane on the binding of  $\text{Ca}^{2+}$  to calmodulin.  $\text{Ca}^{2+}$ /calmodulin titration data were fit to the Hill equation by nonlinear regression analysis.  $K_d$  and  $n$  were derived from nonlinear regression analysis.

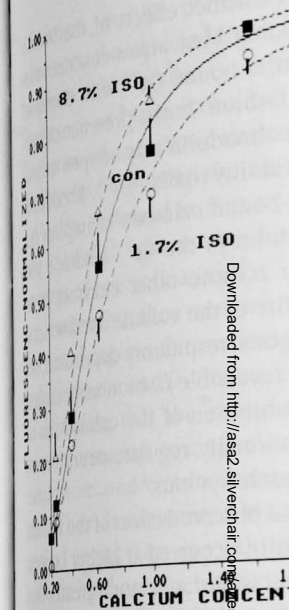

Fig. 2. The effect of isoflurane on the fluorescence response of calmodulin from Sigma Chemical ( $\text{CaM}_s$ ) to  $\text{Ca}^{2+}$  in the presence of 0 (squares), 1.7% (circles), and 8.7% (triangles) isoflurane. Each data point is the mean  $\pm$  SD of three independent determinations.

measured to be zero, both for high isoflurane concentrations (8.7%) and halothane (5.7%). Titrations also were carried out in the presence of control titration resulted in a  $K_d$  of  $5.89 \times 10^{-7}$  M and  $n = 1.81 \pm 0.095$ . The same results were obtained for  $\text{CaM}_c$  as for  $\text{CaM}_s$  when exposed to isoflurane. Figure 4A demonstrates that the leftward shift at 0.57% (0.25 mM) halothane and 1.74% (0.66 mM) isoflurane was completely reversed after evaporation of halothane and isoflurane (fig. 4B). The reversal of  $\text{CaM}_c$  was qualitatively similar to that of  $\text{CaM}_s$  (data not shown). The effect of low and high concentrations of isoflurane on  $\text{CaM}_c$  were compared by two-way analysis of variance. The data sets obtained during exposure to 0.57% and 8.68% isoflurane were statistically significantly different ( $P < 0.05$ ).

## Discussion

We have shown, by using intrinsic tyrosine emission data, that the volatile anesthetics halothane and isoflurane alter calmodulin binding to  $\text{Ca}^{2+}$ .

ANESTHETICS ALTER  $\text{Ca}^{2+}$  BINDING OF CALMODULIN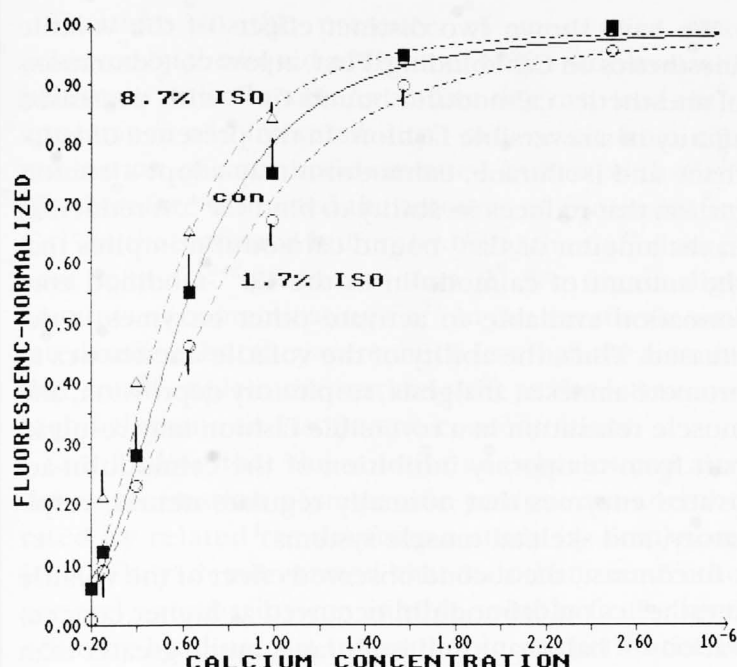

Fig. 2. The effect of isoflurane on the intrinsic tyrosine fluorescence response of calmodulin from Sigma Chemical ( $\text{CaM}_s$ ) to  $\text{Ca}^{2+}$  in the presence of 0 (squares), 1.7% (circles), and 8.7% (triangles) isoflurane. Each data point is the mean  $\pm$  SD of three independent determinations.

measured to be zero, both for high halothane and for high isoflurane concentrations (fig. 3).

Titration curves were also carried out with  $\text{CaM}_c$ . The control titration resulted in a  $K_d$  of  $1.76 \pm 0.66 \times 10^{-6} \text{ M}$  and  $n = 1.81 \pm 0.095$ . The same effect was observed for  $\text{CaM}_c$  as for  $\text{CaM}_s$  when exposed to halothane and isoflurane. Figure 4A demonstrates the shift to the right at 0.57% (0.25 mm) halothane and the marked shift to the left at 5.7% (2.5 mm) halothane. Furthermore, with evaporation of halothane (5.7%, 2.5 mm), there was no reversibility (fig. 4B). The response to isoflurane of  $\text{CaM}_c$  was qualitatively similar to that observed with  $\text{CaM}_s$  (data not shown).

The effect of low and high concentrations of halothane on  $\text{CaM}_c$  were compared by two-way analysis of variance. The data sets obtained from  $\text{Ca}^{2+}$  titrations during exposure to 0.57% and 5.68% halothane were statistically significantly different from the control data set ( $P < 0.05$ ).

## Discussion

We have shown, by using intrinsic tyrosine fluorescence emission data, that the volatile anesthetics halothane and isoflurane alter calmodulin's  $\text{Ca}^{2+}$ -binding

properties. At low concentrations of anesthetic these effects appear reversible, whereas at higher concentrations they are irreversible for both isoflurane and halothane.

Our observations are based on the phenomenon that calmodulin in the presence of  $\text{Ca}^{2+}$  undergoes a conformational shift with a corresponding enhancement of fluorescence.<sup>9</sup> Several sources of evidence support this finding. Spectroscopy studies have shown that  $\text{Ca}^{2+}$  induces structural changes in the third and fourth  $\text{Ca}^{2+}$ -binding domains of calmodulin, where the two tyrosine residues lie.<sup>16</sup> Proteolysis studies have corroborated these findings by noting that calmodulin's third domain undergoes folding in the presence of  $\text{Ca}^{2+}$ , rendering the protein resistant to trypsin digestion.<sup>17</sup> Moreover,  $pK_a$  analysis has shown that the environment of tyrosine 138, which resides in calmodulin's fourth domain, is altered in the presence of  $\text{Ca}^{2+}$ .<sup>18,19</sup>

The conformational change that occurs in the presence of  $\text{Ca}^{2+}$ , in addition to increasing fluorescence emission, exposes hydrophobic regions in calmodulin.<sup>20</sup> These hydrophobic surfaces have been implicated as necessary for calmodulin's stimulatory effects on

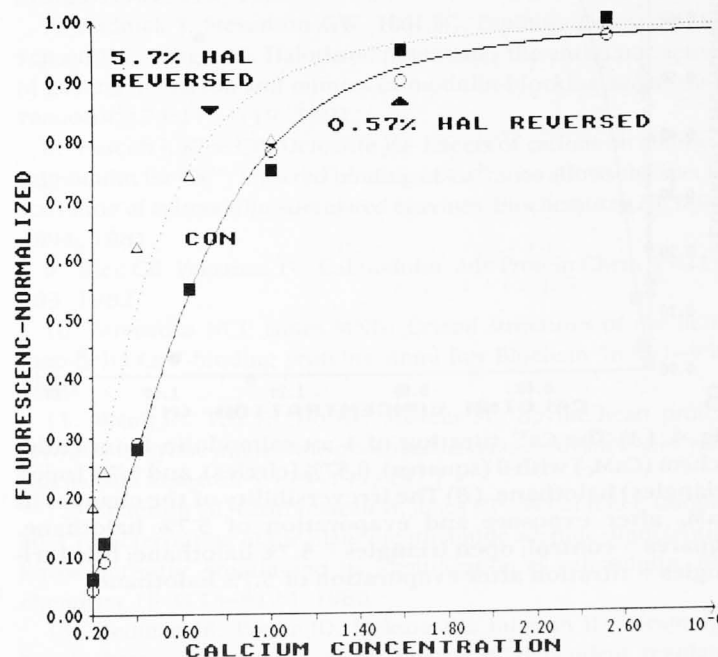

Fig. 3. The reversibility of halothane's effects on the  $\text{Ca}^{2+}$ -binding affinity of calmodulin from Sigma Chemical ( $\text{CaM}_s$ ).  $\text{CaM}_s$  was exposed to 0.57% and 5.7% halothane, which then was allowed to evaporate. Curves for titrations with  $\text{CaM}_s$  exposed to 0.57% (circles) and 5.7% (triangles) halothane that had been allowed to evaporate are compared with control data (squares). The 0.57% halothane reversed curve is coincident with the control curve. Similar results were found with isoflurane.

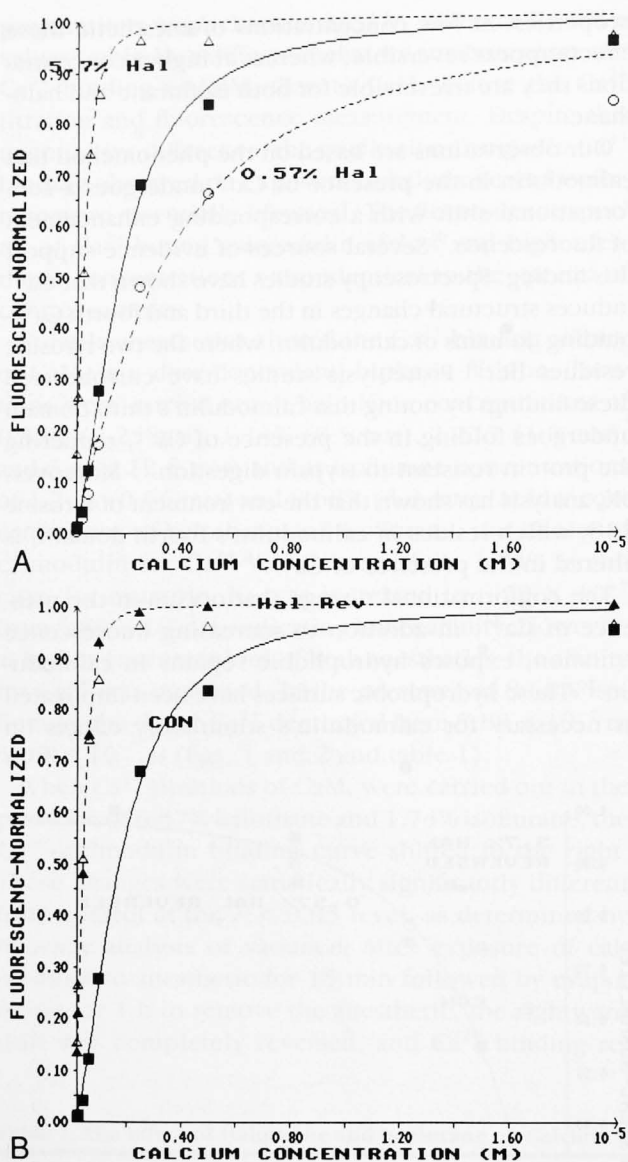

Fig. 4. (A) The  $\text{Ca}^{2+}$  titration of 1  $\mu\text{M}$  calmodulin from Calbiochem ( $\text{CaM}_c$ ) with 0 (squares), 0.57% (circles), and 5.7% (open triangles) halothane. (B) The irreversibility of the changes in  $\text{CaM}_c$  after exposure and evaporation of 5.7% halothane. Squares = control; open triangles = 5.7% halothane; filled triangles = titration after evaporation of 5.7% halothane.

other enzymes.<sup>10</sup> The same hydrophobic residues are also thought to be the sites where a host of lipophilic molecules, including the phenothiazines, interact with calmodulin to block its enzyme-activating steps.<sup>20-25</sup> Perhaps by binding to these hydrophobic sites the lipophilic volatile anesthetics alter calmodulin's  $\text{Ca}^{2+}$ -binding properties.

We have shown two distinct effects of the volatile anesthetics on  $\text{Ca}^{2+}$  binding. First, at low concentrations of anesthetic, calmodulin bound  $\text{Ca}^{2+}$  with decreased affinity in a reversible fashion. In the presence of halothane and isoflurane, calmodulin may adopt a conformation that reduces its ability to bind  $\text{Ca}^{2+}$ . A reduction in the amount of  $\text{Ca}^{2+}$ -bound calmodulin implies that the amount of calmodulin in the  $\text{Ca}^{2+}$ -modified conformation available to activate other enzymes is decreased. Thus, the ability of the volatile anesthetics to promote amnesia, analgesia, respiratory depression, and muscle relaxation in a reversible fashion may result in part from temporary inhibition of the calmodulin-activated enzymes that normally regulate neural, respiratory, and skeletal muscle systems.<sup>1</sup>

In contrast, the second observed effect of the volatile anesthetics on calmodulin occurred at higher concentrations of halothane and isoflurane, much greater than concentrations used clinically. We observed a dose-dependent increase in affinity for  $\text{Ca}^{2+}$ . It is conceivable that at concentrations greater than some critical level, the hydrophobic anesthetics alter calmodulin's folding so that  $\text{Ca}^{2+}$  binding is favored. At high concentrations of both anesthetics, the change in  $\text{Ca}^{2+}$  binding was not reversed, even after the anesthetic concentrations were measured to be zero by gas chromatography. These studies were performed in the dark to prevent the possibility that photoactivation of the anesthetics would lead to a covalent interaction.

One factor in our experimental system that may account for an irreversible alteration in calmodulin structure and  $\text{Ca}^{2+}$  binding is pH change. We observed a decrease in pH in our experimental solutions from 7.00 to 6.75 over the course of  $\text{Ca}^{2+}$  additions in all titration experiments. Three observations, however, make it doubtful that pH shifts explain our results. First, data from Haiech *et al.* suggest that the pH decrease we encountered is not sufficient to alter  $\text{Ca}^{2+}$  binding. Only at pH less than 6.0 is the affinity of calmodulin for  $\text{Ca}^{2+}$  significantly altered.<sup>8</sup> Second, as noted by Haiech *et al.*, a pH decrease confers a concomitant decrease in  $\text{Ca}^{2+}$  affinity.<sup>8</sup> At high concentrations of anesthetics, we saw an increase in  $\text{Ca}^{2+}$  affinity despite a slight pH decrement. Third, although we did observe a decrease in  $\text{Ca}^{2+}$ -binding affinity at low concentrations of halothane and isoflurane, this decrease cannot be ascribed to a pH change, because although the pH change was irreversible, the decrease in  $\text{Ca}^{2+}$  affinity that we observed reversed as the anesthetic evaporated.

Titration in the presence of halothane or isoflurane. An artificial appearance of "irreversibility" in the titration of anesthetic-saturated calmodulin. We therefore estimated the amount of  $\text{Ca}^{2+}$  in the saturated buffers by using the fluorescent dyes green and fura-2. The amounts of contaminating  $\text{Ca}^{2+}$  in the buffers, but they were much smaller than the amount of  $\text{Ca}^{2+}$  that could explain the marked increase in  $\text{Ca}^{2+}$  binding in high halothane and isoflurane. Our finding that the volatile anesthetics alter the conformation of a specific protein is supported by related results from Lieb. They demonstrate that general anesthetics can inhibit calmodulin-dependent kinase by binding at a hydrophobic site on the kinase molecule.<sup>26</sup> Taken together, these results lend further credence to the idea that volatile anesthetics can act by specific interactions with protein molecules and that not all interactions with the lipid bilayer component of the membrane may not be required.

Although we now report significant effects of volatile anesthetics on calmodulin, Blanck *et al.* were unable to show an effect of halothane on troponin C.<sup>27</sup> Troponin C and both members of the EF-hand family of proteins, share as much as 76% sequence identity. The considerable similarity between these proteins is reasonable to expect that the effects of anesthetics on calmodulin may affect both similarly. However, the biphasic nature of the effect of anesthetics on calmodulin, we saw a decrease in  $\text{Ca}^{2+}$  binding was not observed in troponin C because of the conformational change used in that experiment. In the case of troponin C,  $\text{Ca}^{2+}$  binding was measured in the presence of 0.9 mM halothane. These concentrations of halothane and higher concentrations of isoflurane alternately yield a decrease or an increase in  $\text{Ca}^{2+}$  binding in the case of calmodulin and the lack of an observed alteration in troponin C.

In summary, by measuring the fluorescence emission of calmodulin in the presence of concentrations of halothane and isoflurane, we observed decreased calmodulin's  $\text{Ca}^{2+}$  affinity at low anesthetic concentration, however,



ANESTHETICS ALTER  $\text{Ca}^{2+}$  BINDING OF CALMODULIN

Titration in the presence of anesthetics were achieved by the liquid addition of buffer saturated with halothane or isoflurane. An artifact that may lead to the appearance of "irreversibility" may result from contamination of anesthetic-saturated buffers with  $\text{Ca}^{2+}$ . We therefore estimated the amounts of contaminating  $\text{Ca}^{2+}$  in the saturated buffers by using the  $\text{Ca}^{2+}$ -fluorescent dyes  $\text{Ca}^{2+}$  green and fura 2. We found slight amounts of contaminating  $\text{Ca}^{2+}$  in the anesthetic-saturated buffers, but they were much less than the amounts that could explain the marked shift to the left seen at high halothane and isoflurane concentrations.

Our finding that the volatile anesthetics can alter the conformation of a specific protein are corroborated by related results from a study by Franks and Lieb. They demonstrated that halothane and other general anesthetics can inhibit soluble firefly luciferase by binding at a hydrophobic pocket in the luciferase molecule.<sup>26</sup> Taken together, these experiments lend further credence to the theory that general anesthetics can act by specific interactions with target protein molecules and that nonspecific associations with the lipid bilayer component of cell membranes may not be required.

Although we now report significant effects of the volatile anesthetics on calmodulin's ability to bind  $\text{Ca}^{2+}$ , Blanck *et al.* were unable to show similar effects of halothane on troponin C.<sup>27</sup> Troponin C and calmodulin, both members of the EF-hand family of  $\text{Ca}^{2+}$ -binding proteins, share as much as 76% homology. In light of the considerable similarity between these two proteins, it is reasonable to expect that the volatile anesthetics may affect both similarly. However, given the dose-dependent, biphasic nature of the effects of the volatile anesthetics on calmodulin, we suggest that a significant alteration in  $\text{Ca}^{2+}$  binding was not observed in the case of troponin C because of the concentration of halothane used in that experiment. In the troponin experiment,  $\text{Ca}^{2+}$  binding was measured in the presence of 1.0 and 0.9 mM halothane. These concentrations are between the lower and higher concentrations of anesthetic that alternately yield a decrease or an increase in  $\text{Ca}^{2+}$  binding in the case of calmodulin and may be pertinent to the lack of an observed alteration on  $\text{Ca}^{2+}$  binding to troponin C.

In summary, by measuring the  $\text{Ca}^{2+}$ -dependent fluorescence emission of calmodulin, we found that low concentrations of halothane and isoflurane reversibly decreased calmodulin's  $\text{Ca}^{2+}$  affinity. At higher anesthetic concentration, however,  $\text{Ca}^{2+}$  binding was in-

creased in an irreversible fashion both by halothane and by isoflurane.

The authors thank Arthur Silvers, Ph.D., for suggestions for the statistical analysis of the  $\text{Ca}^{2+}$ -binding curves; Velicia White for expert technical assistance; and Damian Blanck for the calculations. The authors also thank Olaf S. Andersen, M.D., for helpful discussions regarding protein conformation.

## References

1. Landers DF, Becker GL, Wong KC:  $\text{Ca}^{2+}$ , calmodulin and anesthesiology. *Anesth Analg* 69:100-112, 1989
2. Bosnjak ZJ, Kampine JP: Effects of halothane on transmembrane potentials,  $\text{Ca}^{2+}$  transients and papillary muscle tension in the cat. *Am J Physiol* H374-H381, 1986
3. Lynch C: Differential depression of myocardial contractility by halothane and isoflurane *in vitro*. *ANESTHESIOLOGY* 64:620-631, 1986
4. Cassella ES, Suite NDA, Fisher YI, Blanck TJJ: The effect of volatile anesthetics on the pH dependence of  $\text{Ca}^{2+}$  uptake by cardiac sarcoplasmic reticulum. *ANESTHESIOLOGY* 69:620-631, 1986
5. Wheeler DM, Rice RT, Hansford RG, Lakatta EG: The effect of halothane on the free intracellular  $\text{Ca}^{2+}$  concentration of isolated rat heart cells. *ANESTHESIOLOGY* 69:578-583, 1988
6. Nosaka S, Wong KC: Smooth muscle contraction and local anesthetics: Calmodulin-dependent myosin light-chain kinase. *Anesth Analg* 69:504-510, 1989
7. Rudnick S, Stevenson GW, Hall SC, Espinoza-Delgado I, Stevenson HC, Longo DL: Halothane potentiates the antitumor activity of gamma interferon and mimics calmodulin-blocking agents. *ANESTHESIOLOGY* 74:115-119, 1991
8. Haiech J, Klee CB, Demaille JG: Effects of cations on affinity of calmodulin for  $\text{Ca}^{2+}$ : Ordered binding of  $\text{Ca}^{2+}$  ions allows the specific activation of calmodulin-stimulated enzymes. *Biochemistry* 20:3890-3894, 1981
9. Klee CB, Vanaman TC: Calmodulin. *Adv Protein Chem* 35:213-303, 1982
10. Strynadka NCJ, James MNG: Crystal structures of the helix-loop-helix  $\text{Ca}^{2+}$ -binding proteins. *Annu Rev Biochem* 58:951-958, 1989
11. Wang JH, Teo TS, Ho HC, Stevens FC: Bovine heart protein activator of cyclic nucleotide phosphodiesterase. *Advances in Cyclic Nucleotide Research* 5:179-194, 1975
12. Anderson JM, Charbonneau H, Jones HP, McCann RO, Cormier MJ: Characterization of the plant nicotinamide adenine dinucleotide kinase activator protein and its identification as calmodulin. *Biochemistry* 19:3113-3120, 1980
13. Dedman JR, Potter JD, Jackson RL, Johnson JD, Means AR: Physicochemical properties of rat testis  $\text{Ca}^{2+}$ -dependent regulator protein cyclic nucleotide phosphodiesterase. *J Biol Chem* 252:8415-8422, 1977
14. Fabiato A, Fabiato F: Calculator program for computing the composition of the solutions containing multiple metals and ligands used for experiments in skinned muscle cells. *J Physiol Paris* 75:463-505, 1979
15. Armitage P: *Statistical Methods in Medical Research*. Oxford, Blackwell Scientific Publications, 1971, pp 217-226

16. Seamon KB: Calcium- and magnesium-dependent conformational states of calmodulin as determined by nuclear magnetic resonance. *Biochem Biophys Res Commun* 19:207-215, 1980
17. Walsh M, Stevens FC, Kuznick J, Drabikowski W: Characterization of tryptic fragments obtained from bovine brain protein modulator of cyclic nucleotide phosphodiesterase. *J Biol Chem* 252:7440-7443, 1977
18. Richman PG: Conformation dependent acetylation and nitration of the protein activation of cyclic adenosine 3',5'-monophosphate phosphodiesterase: Selective nitration of tyrosine residue 130. *Biochemistry* 17:3001-3005, 1978
19. Richman PG, Klee CB: Conformation dependent nitration of the protein activator of cyclic adenosine 3',5'-monophosphate diesterase. *Biochemistry* 17:928-935, 1978
20. Laporte DC, Wierman BM, Storm DR:  $Ca^{2+}$  induced exposure of a hydrophobic surface on calmodulin. *Biochemistry* 19:3814-3819, 1980
21. Gietzen K, Wuthrich A, Bader H: R 24571: A new powerful inhibitor of red blood cell  $Ca$ -transport ATPase and of calmodulin regulated functions. *Biochem Biophys Res Commun* 101:418-425, 1981
22. Sharma RK, Wang JH: Inhibition of calmodulin-activated cyclic nucleotide phosphodiesterase by triton X-100. *Biochem Biophys Res Commun* 100:710-715, 1981
23. Massom L, Lee H, Jarrett HW: Trifluoperazine binding to porcine brain calmodulin and skeletal muscle troponin C. *Biochemistry* 29:671-681, 1990
24. Faust FM, Slisz M, Jarrett HW: Calmodulin is labeled at lysine 148 by a chemically reactive phenothiazine. *J Biol Chem* 262:1938-1941, 1987
25. Newton DL, Oldewurtel MD, Krinks MH, Shiloach J, Klee CB: Agonist and antagonist properties of calmodulin fragments. *J Biol Chem* 259:4419-4426, 1984
26. Franks NP, Lieb WR: Do general anesthetics act by competitive binding to specific receptors? *Nature* 310:599-601, 1984
27. Blanck TJJ, Chiancone E, Salviati G, Heitmiller ES, Verzili D, Liciani G: Halothane does not alter  $Ca^{2+}$  affinity of troponin C. *ANESTHESIOLOGY* 76:100-105, 1992

## Amrinone Is Superior to Bupivacaine in the Treatment of Bupivacaine-Induced Cardiovascular Depression in Sevoflurane-Anesthetized Dogs

Kazuhiko Saitoh, M.D.,\* Yoshihiro Hara, M.D.,†

**Background:** Bupivacaine-induced cardiovascular depression is known to be difficult to treat, and the use of amrinone for treatment of bupivacaine-induced cardiovascular depression is in doubt. We compared the effects of amrinone and epinephrine for the treatment of bupivacaine-induced cardiovascular depression in sevoflurane-anesthetized dogs. **Methods:** In dogs receiving 1.5-2.0 mg/kg bupivacaine, amrinone (0.5 mg/kg) was infused at a rate of 0.1 mg/kg/min until mean arterial blood pressure (MABP) fell to 40 mmHg or less. In the amrinone group, MABP was restored to 40 mmHg or more within 10 min. In the epinephrine group, MABP was restored to 40 mmHg or more within 10 min. **Results:** All nine dogs that received amrinone showed tachycardia with wide QRS complex, whereas all nine animals that received epinephrine showed tachycardia with wide QRS complex. **Conclusions:** Amrinone is superior to epinephrine in the treatment of bupivacaine-induced cardiovascular depression in sevoflurane-anesthetized dogs. (Am J Anesth 1995;2:127-133)

**Keywords:** amrinone, bupivacaine, cardiovascular depression, pharmacology, pathologic nervous system, catecholamines.

\* Clinical Assistant.

† Lecturer.

‡ Professor and Chair.

Received from the Department of Anesthesiology, Jichi Medical School, Tochigi, Japan. Submitted for publication March 20, 1995.

Address reprint requests to Dr. Saitoh: Jichi Medical School, 3311-1 Minamishinmachi, Tochigi, 329-04 Japan.

§ Guide for Laboratory Animals. Tokyo: Jichi Medical School, 1993.

|| American Physiological Society: Guide for the Care and Use of Animals. Bethesda, MD, 1993.
